# Supplementary material
Source: publisher figshare collection journal article supplement (https://acs.figshare.com/ndownloader/files/7415581)
Supplement: Supplementary file 1 [file 7415581]

## Supporting Information

# Direct Observation of Indium Conductive Filaments in Transparent, Flexible, and Transferable Resistive Switching Memory

*Kai Qian<sup>†</sup>, Roland Yingjie Tay<sup>‡</sup>, Meng-Fang Lin<sup>†</sup>, Jingwei Chen<sup>†</sup>, Huakai Li<sup>‡</sup>, Jinjun Lin<sup>‡</sup>,  
Jiangxin Wang<sup>†</sup>, Guofa Cai<sup>†</sup>, Viet Cuong Nguyen<sup>†</sup>, Edwin Hang Tong Teo<sup>†,‡</sup>, Tu Pei Chen<sup>‡</sup>,  
and Pooi See Lee <sup>\*†</sup>*

<sup>†</sup>School of Materials Science and Engineering, and <sup>‡</sup>School of Electrical and Electronic Engineering, 50 Nanyang Avenue, Nanyang Technological University, 639798, Singapore.

\*Corresponding author, E-mail: [pslee@ntu.edu.sg](mailto:pslee@ntu.edu.sg)

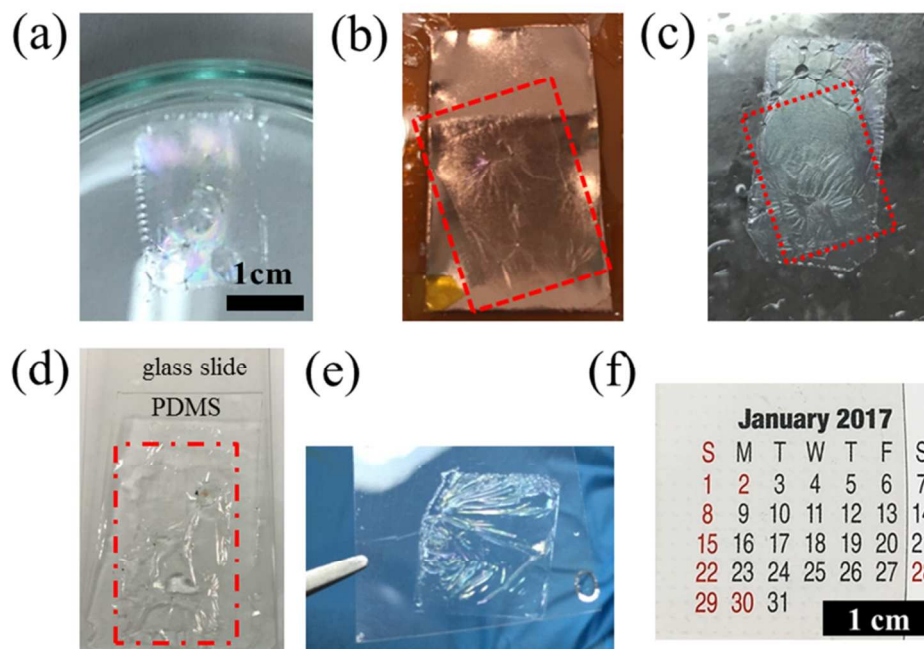

**Figure S1.** (a) hBN film with PMMA in DI water after removal of Cu foil substrate. (b) The transferred hBN film with PMMA onto graphene/Cu foil. The hBN/PMMA film was highlighted by the red rectangle frame. (c) The transferred hBN/graphene film with PMMA in DI water after removal of Cu foil substrate. The hBN/PMMA film was highlighted by the red rectangle frame. (d) The hBN/graphene film with PMMA was transferred onto PDMS substrate. The hBN/graphene film was indicated by the red rectangle frame. (e) The transferred hBN film with PMMA onto ITO/PET substrate. After removal of PMMA using acetone, ITO top electrode was deposited on the hBN/ITO/PET to construct transparent and flexible ITO/hBN/ITO/PET memory device (f).

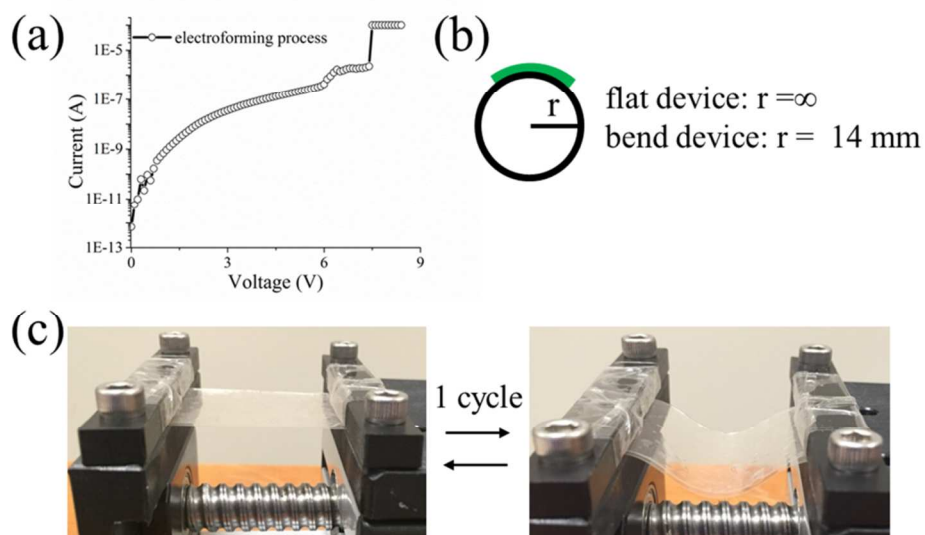

**Figure S2.** (a) A typical electroforming process with a relatively high voltage of  $\sim 7.4 \text{ V}$  in an ITO TE/HBN/graphene/PDMS memory device. (b, c) Illustration of 1 cycle bending test with bending radius of 14 mm. The measured memory cells were near the middle of the sample.

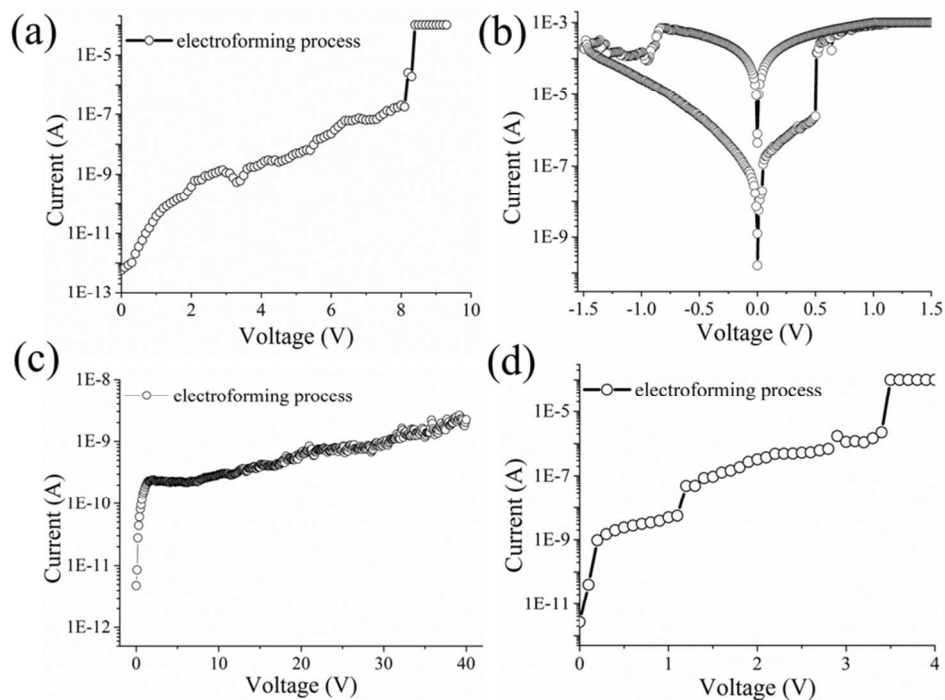

**Figure S3.** (a) Initial electroforming process for ITO TE/hBN/ITO/PET memory device with voltage of ~8.3V. (b) Switching characteristics of ITO TE/hBN/ITO/PET memory device after electroforming process. (c) Initial electroforming process for ITO/hBN/FLG/Cu foil memory device. During the electroforming process, the positive voltage was applied on the graphene/Cu foil electrode, while the ITO electrode was grounded. It is clear that there was no resistive switching even with a high voltage, indicating the Cu foil which was isolated by few-layer graphene cannot contribute the resistive switching. (d) Initial electroforming process for Ag TE/hBN/FLG/Cu foil memory device with voltage of ~3.5V.

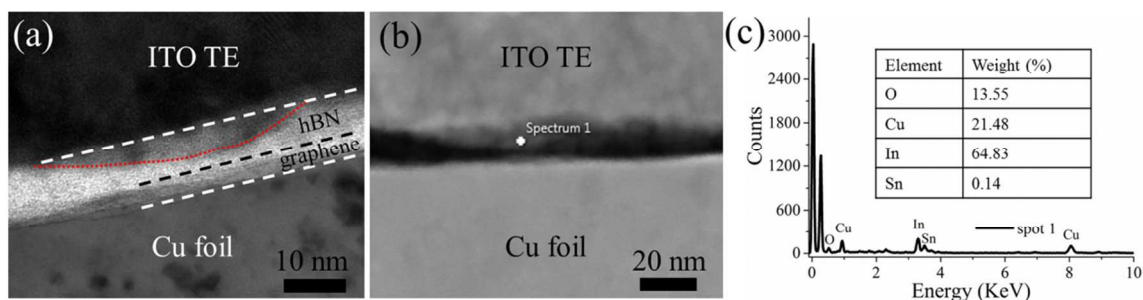

**Figure S4.** Observation of conductive filaments in ITO TE /hBN/FLG/Cu foil memory cell at OFF state. (a) TEM image of a non-complete filament in the memory cell (highlighted by the closed regions), indicating the filament ruptured at the thinnest part of the filament at the hBN/graphene interface, leading to the OFF state. (b) STEM image of the ITO TE /hBN/FLG device, corresponding to (a). (c) EDS spectrum of the filament in region “1” of (b).

The memory cell was reset to the OFF-state through more than 20 repetitive switching cycles for the *ex-situ* TEM measurements. **Figure S4a** showed a cross-sectional TEM image of the OFF-state sample after RESET process. The OFF-state filament (**Figure S4a**) with a wider base at the ITO/hBN interface and thinner part at the hBN/graphene interface is similar to the one at ON-state (**Figure 4b**). It is clear that the dissolution of the filament occurred at the hBN/graphene interface where the thinnest part of filament was, leading to the OFF state. To determine the nature of the ruptured filament, the filament composition was studied *via* EDS point analysis (region 1 in **Figure S4b**). As shown in **Figure S4c**, the detailed studies verified that the ruptured filament is mainly composed of In element

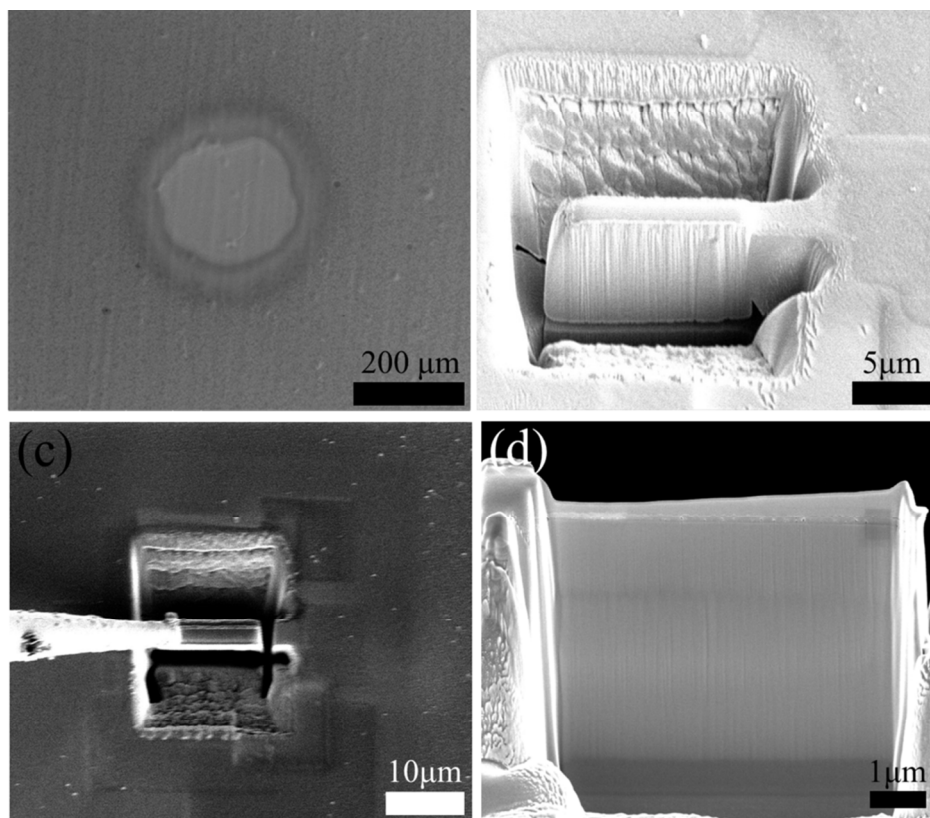

**Figure S5.** SEM images showing the *ex-situ* TEM specimen preparation *via* FIB. (a) ITO/hBN/graphene/Cu foil memory cell. (b) The memory cell was cut using a focused ion beam with a Ga ion beam at 30 kV beam energy. (c) FIB lift-out process (d) The memory cell was thinned down to ~ 100 nm and cleaned at 8 kV beam energy.

The cross sectional TEM specimen was prepared out of the ITO/hBN/graphene memory cell by successive cutting, lift-out and thinning processes. As shown in **Figure S5**, the ITO/hBN/graphene memory cell (**Figure S5a**) was cut using a FIB with a Ga ion beam at 30 kV beam energy (**Figure S5b**), followed by lift out (**Figure S5c**), thinning (down to ~100 nm) and cleaning at 8 kV beam energy (**Figure S5d**).
